# Supplementary material for: Physical Activity Attenuates the Effect of Low Birth Weight on Insulin Resistance in Adolescents: Findings From Two Observational Studies
Source: PubMed Central journal article supplement — Diabetes. 2011 Aug 20;60(9):2295–9. doi: 10.2337/db10-1670 (PMC3161315; doi:10.2337/db10-1670), 2011-08-20
Supplement: supp_db10-1670_DB101670SupplementaryData.pdf [file supp_db10-1670_DB101670SupplementaryData.pdf]

## SUPPLEMENTARY DATA

### HELENA Study Group

**Co-ordinator:** Luis A. Moreno.

**Core Group members:** Luis A. Moreno, Frédéric Gottrand, Stefaan De Henauw, Marcela González-Gross, Chantal Gilbert.

**Steering Committee:** Anthony Kafatos (President), Luis A. Moreno, Christian Libersa, Stefaan De Henauw, Sara Castelló, Frédéric Gottrand, Mathilde Kersting, Michael Sjöstrom, Dénes Molnár, Marcela González-Gross, Jean Dallongeville, Chantal Gilbert, Gunnar Hall, Lea Maes, Luca Scalfi.

**Project Manager:** Pilar Meléndez.

**1. Universidad de Zaragoza (Spain)**

Luis A. Moreno, Jesús Fleta, José A. Casajús, Gerardo Rodríguez, Concepción Tomás, María I. Mesana, Germán Vicente-Rodríguez, Adoración Villarroya, Carlos M. Gil, Ignacio Ara, Juan Revenga, Carmen Lachen, Juan Fernández Alvira, Gloria Bueno, Aurora Lázaro, Olga Bueno, Juan F. León, Jesús M<sup>a</sup> Garagorri, Manuel Bueno, Juan Pablo Rey López, Iris Iglesia, Paula Velasco, Silvia Bel.

**2. Consejo Superior de Investigaciones Científicas (Spain)**

Ascensión Marcos, Julia Wärnberg, Esther Nova, Sonia Gómez, Ligia Esperanza Díaz, Javier Romeo, Ana Veses, Belén Zaptera, Tamara Pozo, David Martínez.

**3. Université de Lille 2 (France)**

Laurent Beghin, Christian Libersa, Frédéric Gottrand, Catalina Iliescu, Juliana Von Berlepsch.

**4. Research Institute of Child Nutrition Dortmund, Rheinische Friedrich-Wilhelms-Universität Bonn (Germany)**

Mathilde Kersting, Wolfgang Sichert-Hellert, Ellen Koeppen.

**5. Pécsi Tudományegyetem (University of Pécs) (Hungary)**

Dénes Molnar, Eva Erhardt, Katalin Csernus, Katalin Török, Szilvia Bokor, Mrs. Angster, Enikő Nagy, Orsolya Kovács, Judit Répasi.

**6. University of Crete School of Medicine (Greece)**

Anthony Kafatos, Caroline Codrington, María Plada, Angeliki Papadaki, Katerina Sarri, Anna Viskadourou, Christos Hatzis, Michael Kiriakakis, George Tsibinos, Constantine Vardavas, Manolis Sbokos, Eva Protoyeraki, Maria Fasoulaki.

**7. Institut für Ernährungs- und Lebensmittelwissenschaften – Ernährungphysiologie. Rheinische Friedrich Wilhelms Universität (Germany)**

Peter Stehle, Klaus Pietrzik, Marcela González-Gross, Christina Breidenassel, Andre Spinneker, Jasmin Al-Tahan, Miriam Segoviano, Anke Berchtold, Christine Bierschbach, Erika Blatzheim, Adelheid Schuch, Petra Pickert.

**8. University of Granada (Spain)**

Manuel J. Castillo, Ángel Gutiérrez, Francisco B Ortega, Jonatan R Ruiz, Enrique G Artero, Vanesa España, David Jiménez-Pavón, Palma Chillón, Cristóbal Sánchez-Muñoz, Magdalena Cuenca

**9. Istituto Nazionalen di Ricerca per gli Alimenti e la Nutrizione (Italy)**

Davide Arcella, Elena Azzini, Emma Barrison, Noemi Bevilacqua, Pasquale Buonocore, Giovina Catasta, Laura Censi, Donatella Ciarapica, Paola D'Acapito, Marika Ferrari, Myriam Galfo, Cinzia Le Donne, Catherine Leclercq, Giuseppe Maiani, Beatrice Mauro, Lorenza Mistura, Antonella Pasquali, Raffaella Piccinelli, Angela Polito, Raffaella Spada, Stefania Sette, Maria Zaccaria.

**10. University of Napoli "Federico II" Dept of Food Science (Italy)**

Luca Scalfi, Paola Vitaglione, Concetta Montagnese.

## SUPPLEMENTARY DATA

11. **Ghent University (Belgium)**  
Ilse De Bourdeaudhuij, Stefaan De Henauw, Tineke De Vriendt, Lea Maes, Christophe Matthys, Carine Vereecken, Mieke de Maeyer, Charlene Ottevaere, Inge Huybrechts.
12. **Medical University of Vienna (Austria)**  
Kurt Widhalm, Katharina Phillipp, Sabine Dietrich, Birgit Kubelka  
Marion Boriss-Riedl.
13. **Harokopio University (Greece)**  
Yannis Manios, Eva Grammatikaki, Zoi Bouloubasi, Tina Louisa Cook, Sofia Eleutheriou, Orsalia Consta, George Moschonis, Ioanna Katsaroli, George Kraniou, Stalo Papoutsou, Despoina Keke, Ioanna Petraki, Elena Bellou, Sofia Tanagra, Kostalena Kallianoti, Dionysia Argyropoulou, Katerina Kondaki, Stamatoula Tsikrika, Christos Karaikos.
14. **Institut Pasteur de Lille (France)**  
Jean Dallongeville, Aline Meirhaeghe.
15. **Karolinska Institutet (Sweden)**  
Michael Sjöstrom, Jonatan R Ruiz, Francisco B. Ortega, María Hagströmer, Anita Hurtig Wennlöf, Lena Hallström, Emma Patterson, Lydia Kwak, Julia Wärnberg, Nico Rizzo.
16. **Asociación de Investigación de la Industria Agroalimentaria (Spain)**  
Jackie Sánchez-Molero, Sara Castelló, Elena Picó, Maite Navarro, Blanca Viadel, José Enrique Carreres, Gema Merino, Rosa Sanjuán, María Lorente, María José Sánchez.
17. **Campden BRI (United Kingdom)**  
Chantal Gilbert, Sarah Thomas, Elaine Allchurch, Peter Burgess.
18. **SIK - Institutet foer Livsmedel och Bioteknik (Sweden)**  
Gunnar Hall, Annika Astrom, Anna Sverkén, Agneta Broberg.
19. **Meurice Recherche & Development asbl (Belgium)**  
Annick Masson, Claire Lehoux, Pascal Brabant, Philippe Pate, Laurence Fontaine.
20. **Campden & Chorleywood Food Development Institute (Hungary)**  
Andras Sebok, Tunde Kuti, Adrienn Hegyi.
21. **Productos Aditivos SA (Spain)**  
Cristina Maldonado, Ana Llorente.
22. **Cárnicas Serrano SL (Spain)**  
Emilio García.
23. **Cederroth International AB (Sweden)**  
Holger von Fircks, Marianne Lilja Hallberg, Maria Messerer
24. **Lantmännen Food R&D (Sweden)**  
Mats Larsson, Helena Fredriksson, Viola Adamsson, Ingmar Börjesson.
25. **European Food Information Council (Belgium)**  
Laura Fernández, Laura Smillie, Josephine Wills.
26. **Universidad Politécnica de Madrid (Spain)**  
Marcela González-Gross, Jara Valtueña, David Jiménez-Pavón, Ulrike Albers, Raquel Pedrero, Agustín Meléndez, Pedro J. Benito, Juan José Gómez Lorente, David Cañada, Alejandro Urzanqui, Francisco Fuentes, Juan Carlos Ortiz, Rosa María Torres, Paloma Navarro.
